RESEARCH ARTICLE

# Docosahexaenoic Acid and Adult Memory: A Systematic Review and Meta-Analysis

Karin Yurko-Mauro<sup>1\*</sup>, Dominik D. Alexander<sup>2</sup>, Mary E. Van Elswyk<sup>3</sup>

**1** Clinical Research, Nutritional Lipids, DSM Nutritional Products, Columbia, Maryland, United States of America, **2** Epidemiology, EpidStat Institute, Evergreen, Colorado, United States of America, **3** Scientific Affairs, Van Elswyk Consulting, Inc., Longmont, Colorado, United States of America

\* [karin.yurko-mauro@dsm.com](mailto:karin.yurko-mauro@dsm.com)

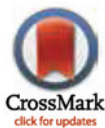

OPEN ACCESS

**Citation:** Yurko-Mauro K, Alexander DD, Van Elswyk ME (2015) Docosahexaenoic Acid and Adult Memory: A Systematic Review and Meta-Analysis. PLoS ONE 10(3): e0120391. doi:10.1371/journal.pone.0120391

**Academic Editor:** Hemachandra Reddy, Texas Tech University Health Science Centers, UNITED STATES

**Received:** August 7, 2014

**Accepted:** February 2, 2015

**Published:** March 18, 2015

**Copyright:** © 2015 Yurko-Mauro et al. This is an open access article distributed under the terms of the [Creative Commons Attribution License](https://creativecommons.org/licenses/by/4.0/), which permits unrestricted use, distribution, and reproduction in any medium, provided the original author and source are credited.

**Data Availability Statement:** All relevant data are within the paper and its Supporting Information files.

**Funding:** DSM Nutritional Products provided funding for the preparation of this manuscript. The funders had no role in data collection or analysis but contributed to study design and manuscript preparation as KYM is an employee of DSM Nutritional Products.

**Competing Interests:** KYM is currently employed by DSM Nutritional Products. DSM Nutritional Products produces and sells nutritional oils rich omega-3 and omega-6 fatty acids, vitamins and other nutritional

## Abstract

### Introduction

Subjective memory complaints are common with aging. Docosahexaenoic acid (DHA; 22:6 n-3) is a long-chain polyunsaturated fatty acid (LCPUFA) and an integral part of neural membrane phospholipids that impacts brain structure and function. Past research demonstrates a positive association between DHA plasma status/dietary intake and cognitive function.

### Objectives

The current meta-analysis was designed to determine the effect of DHA intake, alone or combined with eicosapentaenoic acid (EPA; 20:5 n-3), on specific memory domains: episodic, working, and semantic in healthy adults aged 18 years and older. A secondary objective was to systematically review/summarize the related observational epidemiologic literature.

### Methods

A systematic literature search of clinical trials and observational studies that examined the relationship between n-3 LCPUFA on memory outcomes in healthy adults was conducted in Ovid MEDLINE and EMBASE databases. Studies of subjects free of neurologic disease at baseline, with or without mild memory complaints (MMC), were included. Random effects meta-analyses were conducted to generate weighted group mean differences, standardized weighted group mean differences (Hedge's *g*), *z*-scores, and *p*-values for heterogeneity comparing DHA/EPA to a placebo. *A priori* sub-group analyses were conducted to evaluate the effect of age at enrollment, dose level, and memory type tested.

### Results

Episodic memory outcomes of adults with MMC were significantly ( $P < .004$ ) improved with DHA/EPA supplementation. Regardless of cognitive status at baseline,  $> 1$  g/day DHA/EPA improved episodic memory ( $P < .04$ ). Semantic and working memory changes from baseline were significant with DHA but no between group differences were detected.

ingredients. Dr. Yurko-Mauro provided interpretation of data, critical revision, and final approval of the manuscript. MVE is an employee of Van Elswyk Consulting Inc. and receives compensation from DSM Nutritional Products and other companies to provide consulting services. Service for this manuscript included literature screening, data extraction, critical revision, editing, and final approval of the manuscript. DA is an employee of EpidStat Institute and a former employee of Exponent, Inc. and received compensation from DSM Nutritional Products for statistical analysis of data, interpretation of data, editing, and final approval of the current manuscript.

Observational studies support a beneficial association between intake/blood levels of DHA/EPA and memory function in older adults.

## Conclusion

DHA, alone or combined with EPA, contributes to improved memory function in older adults with mild memory complaints.

## Introduction

Docosahexaenoic acid (DHA; 22:6 n-3), is a long-chain omega-3 fatty acid (n-3 LCPUFA) and is an integral part of neural membrane phospholipids and as such impacts brain structure and function. Early in life DHA is rapidly accumulated by neural tissue contributing to development of the brain and eyes [1]. At the opposite of end of the age spectrum many, but not all, observational studies demonstrate a beneficial association between DHA and /or EPA blood levels/dietary intake and various aspects of cognitive function in older adults [2,3,4]. Results from clinical trials evaluating the effect of DHA on cognitive function are difficult to summarize however, due, at least in part, to the myriad of cognitive tests employed between studies and the diversity of subjects with regard to age and cognitive status. To date, meta-analyses of clinical trials have assessed composite memory scores or the results of individual memory tests, e.g. immediate recall, as opposed to a particular memory domain, and have considered data almost exclusively from trials of older adults [5,6,7,8]. A recent meta-analysis of composite memory scores reported in clinical trials supplementing DHA, alone or in combination with EPA (DHA/EPA), to older adults found no benefit on composite memory, but reported a significant improvement in immediate recall among individuals with mild memory complaints (MMC) [8]. Immediate recall specifically tests episodic memory [9]. Among cognitive deficits, subjective memory complaints are common in the aging population with changes in episodic memory being some of the earliest cognitive changes observed in older adults [10,11,12]. In an effort to more clearly define the role that DHA/EPA supplementation may play in specific aspects of memory function and to better understand responsiveness to DHA/EPA supplementation with aging, the current meta-analysis uniquely categorized results of memory tests from clinical trials into individual memory types, i.e. episodic, semantic, and working memory, and included results from trials of healthy adults (18 years and older) with or without MMC. The current meta-analysis was designed to determine the effect of supplementation of DHA alone, or in combination with EPA, on specific memory functions in healthy adults participating in clinical trials. A secondary objective was to systematically review the observational epidemiologic literature on DHA/EPA and memory outcomes to date in healthy adults.

## Methods

### Information Sources

To identify relevant studies, a comprehensive literature search was conducted by the University of Colorado Denver Health Science Library using two scientific literature databases (Ovid/Medline and Embase) through January 2013. Supplementary literature searches included examining the reference lists of all relevant studies, pertinent review articles, and meta-analyses. Included studies published after the date of literature search through the date of meta-analysis (July 2013) were identified via publication alerts.

## Search Strategy

Relevant terms representing EPA and DHA, as well as their dietary sources, and memory were used for each database searched. Spellings of search terms depended on whether U.S. or European databases were being searched. When appropriate, subject headings were exploded and terms truncated (See Supporting Information—[S1 Search Strategy](#)).

## Eligibility Criteria

Clinical trials and observational, epidemiologic studies describing the effect of DHA intake, alone or in combination with EPA, from conventional or fortified sources (foods or dietary supplements) on memory outcomes in healthy adults were considered for review. Eligible studies were conducted in adults residing in the community at baseline with or without MMC. Studies were excluded if: they failed to report memory outcomes, reported fish intake only (i.e., no DHA/EPA levels in diet or blood), studied subjects with current diagnosis of Alzheimer's disease, dementia, vascular dementia, stroke, head injury, substance abuse, metabolic disturbance, depression, behavioural, or neurologic disorder; enrolled subjects with group mean baseline MMSE scores <24 or reported greater than 10% use of psychotropic, anti-depressant, stimulant, or drugs approved for Alzheimer's/dementia treatment in the study sample. Studies published in a language other than English were excluded if translation was unavailable. Letters, case reports, position statements, conference proceedings, prevalence surveys, reviews, in vitro studies and studies in animals were excluded. Studies that did not specify the amount or dose of DHA or DHA/EPA supplemented or where DHA/EPA was not evaluated independent of another active, e.g. DHA combined with vitamins/minerals without a DHA or DHA/EPA alone arm, were also excluded.

## Study Selection

Level I screening included a review of all titles and/or abstracts compared to eligibility criteria. Full-text publications of any studies not eliminated at Level I were retrieved for complete review at Level II screening. All search results were screened by two individuals with approximately 95% agreement regarding included and excluded studies. Differences were resolved by discussion and consultation with a third researcher as needed.

## Data Collection Process

A data extraction sheet was created in Excel to capture all data of interest from intervention trials. One independent extractor completed data extraction for all studies, one review author checked text entries, and one independent quality control person checked all numeric outcome data. Study authors (n = 12) were contacted via email to collect results mentioned but not reported, raw data when only adjusted or converted means were presented, and to verify testing methods. Over 80% of authors contacted responded with requested information. Data from observational trials were summarized in narrative format and were not subject to quantitative analysis.

## Data Items

The following list of data items (not exhaustive) were extracted from published intervention trials: (1) study identification details (including study first author; year of study publication; title of publication [1<sup>st</sup> five words]; country where study was conducted; region of country where study was conducted; study type (RCT or OBS); double-blind [yes or no]; (2) subject baseline demographics (including baseline cognitive status [No cognitive complaints, mild

memory complaints]; global dementia score; family history of dementia [%]; APO  $\epsilon$ 4 status [% negative]; age range; MMSE scores; years of education; distribution of male and female subjects; (3) intervention details (including control product used [name and dosage]; treatment product used [name and dosage]; dose of EPA in treatment [g]; dose of DHA in treatment [g]; dose of EPA+DHA in treatment [g]; food or dietary supplement delivery; duration [days]); (4) dietary details (including baseline diet assessment method, baseline diet information); (5) data details (including number of completed subjects in each group; number of enrolled subjects; name of memory outcome [e.g. immediate recall; verbal fluency, etc.]; (6) outcome assessment method; (7) outcome unit as reported by author; (8) standard deviations [recorded if reported by author or calculated from available data]; (9) pre and post-study memory outcome means. Few studies reported data for global dementia score, family history of dementia and APO  $\epsilon$ 4 status. More items were collected/calculated than ultimately used in final statistical analysis.

## Memory Tests

Results of neuropsychological tests as reported by study authors were classified into memory types (episodic, semantic, working) and verified by an independent cognition expert. For example, tests of immediate and delayed word list recall, word recognition, story recall, picture recall, the Rey Complex Figure Test, CANTAB PAL, and verbal recognition memory were all classified as tests of episodic memory (See Supporting Information—[S1 Table](#)).

Data reported for all outcomes of interest were utilized. In cases where only % accuracy data was reported, the proportion of correct responses was multiplied by the number of test items to obtain the mean and corresponding standard deviation (SD) values.

In some publications authors report individual as well as memory composite score means. Initial extraction collected all available data. However, analyzing both the individual test means and the composite means for a study would double-count the same results data from one study. Data for overlapping composites was not subject to further analysis in favor of keeping individual test means for meta-analysis.

## Summary Measures and Results Synthesis

Effect sizes were based on group mean differences (post-study minus pre-study test scores) and corresponding standard deviations (SDs) between the treatment group and the control (placebo) group. When SDs were not reported, methods described in the Cochrane Handbook for Systematic Reviews of Interventions [13] were relied upon to calculate or estimate SDs from other statistics provided in the published paper (e.g., SDs were calculated from standard errors or confidence intervals) and subsequently recorded in the extraction sheet as calculated values. In cases where means were not reported (i.e. % accuracy data), the proportion of correct responses was multiplied by the number of test items to obtain the mean and corresponding SDs. In some publications where authors reported individual as well as memory composite score means, only individual memory outcome scores were further analyzed.

Effect sizes between treatment and placebo groups for continuous memory outcomes were calculated based on raw group differences as well as standardized group differences using Hedge's *g* statistics [14]. This approach permits combining multiple memory-related tests for which different scales were used to measure scores and has been used in a similar meta-analysis [8]. Random-effects meta-analysis models were used to generate between and within group effect sizes.

*A priori* analyses were defined for within and between groups. Macro-level models included data on all subjects, regardless of baseline cognitive status or age, at all dose levels using the longest duration of exposure for each memory type (i.e. episodic, semantic, or working). For each

memory type, *a priori* sub-group analyses were conducted for subjects with no cognitive complaints (NCC) vs. those with MMC, age above or below 45 years, and DHA/EPA doses above or below 1 g/day. For studies reporting immediate recall, additional models were considered, including one regardless of cognitive status at baseline and one stratified by NCC vs. MMC. The weight of each study in the meta-analysis was based on the inverse of the variance, a measure that accounts for the sample size within each group. Additional *post-hoc* subgroup analyses were used to complete a comprehensive examination of DHA dose-response to discern any potential pattern or threshold of effect of dose. Heterogeneity was evaluated using the Cochran’s Q statistic and the I<sup>2</sup> statistic.

### Risk of bias

For RCTs included in the meta-analysis, risk of individual study bias was assessed using the Cochrane risk of bias assessment tool, version 5.1.0. Publication bias on the primary meta-analyses models were evaluated visually using funnel plots and statistically using Egger’s regression techniques, and the Trim and Fill method. All analyses were conducted using Comprehensive Meta-Analyses software, version 2 (Biostat, Englewood, NJ).

## Results

### Search Results

The original search yielded 1191 references, of which 965 were excluded based on initial (Level I) screening of abstracts and/or titles (Fig. 1). The most common reasons for exclusion of trials at Level I screening were irrelevant subject matter or narrative review without original data. Full-text publications of 69 studies were retrieved for complete full-text review at Level II.

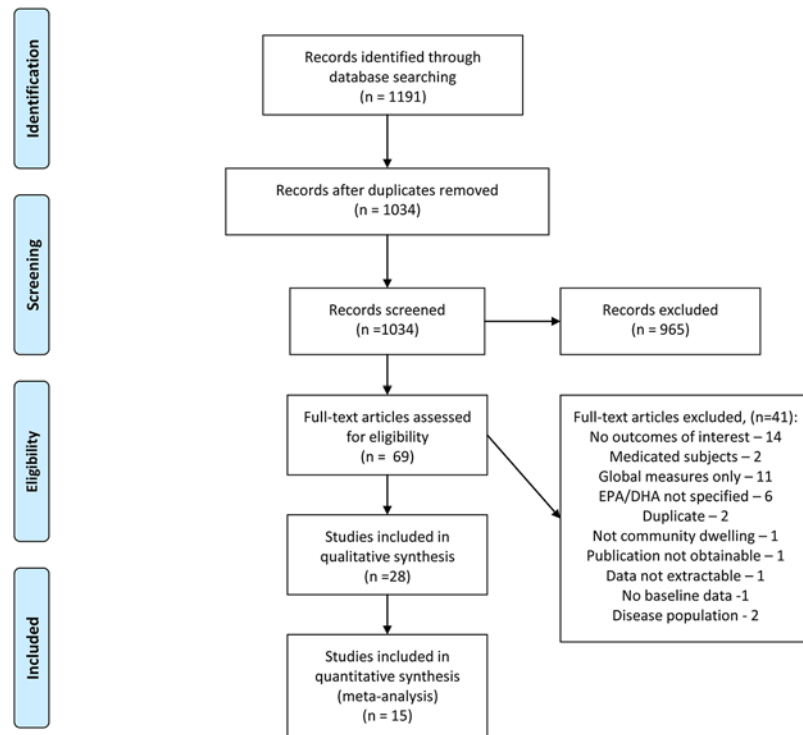

**Fig 1. Flow Diagram of Study Selection.**

doi:10.1371/journal.pone.0120391.g001

Citations for studies excluded at Level II with reason for exclusion are listed in Appendix II. Most studies were excluded for failing to provide a memory-related outcome (no outcomes of interest) or only reporting global cognitive scores (global measures only). Of the excluded observational epidemiologic studies, the majority did not estimate DHA/EPA dietary intakes (DHA/EPA not specified). Although some trials and observational studies had more than one reason for exclusion, each study was classified into only one exclusion category to avoid counting a study multiple times. A total of 28 studies (intervention and observational) were included in the qualitative aspect of this review and 15 intervention studies (62 data points) were included in the meta-analysis.

## Study Characteristics

The main study characteristics of the 15 intervention trials included in the meta-analysis are summarized in [Table 1](#). Richter et al. [22] met all inclusion criteria, and is summarized in [Table 1](#), but these data were not included in the between group meta-analysis because the study was not placebo-controlled. These data were, however, included in the within-group meta-analysis. The majority of studies were conducted in subjects without cognitive complaints ( $n = 9$ ) and ranged from 28–730 days in duration, averaging 4–6 months. Most studies were conducted with subjects  $\geq 45$  years of age ( $n = 11$ ) and exclusively with or included an arm with a DHA-rich source of DHA/EPA providing up to 1.55 g DHA per day ( $n = 12$ ). Sample sizes varied, but most ( $n = 8$ ) enrolled at least 100 subjects.

The main study characteristics of the 13 observational studies reviewed are summarized in [S2 Table](#) (See Supporting Information). Most ( $n = 7$ ) were prospective cohort studies of community dwelling individuals (20–70 years old) with no cognitive complaints at baseline. Studies ( $n = 10$ ) primarily examined the association between DHA/EPA blood levels and cognitive outcomes although some reported the association between cognition and daily DHA/EPA dietary intake. Studies were primarily conducted in European Union countries ( $n = 9$ ) followed by the U.S. ( $n = 3$ ) and Australia ( $n = 1$ ).

## Meta-Analysis Results

The majority of included studies were of low ( $n = 8$ ) to moderate risk ( $n = 4$ ) of bias. Three studies were of high risk of bias of which one [22] was only included in within-group analyses due to single blind study design. Of the remaining two high risk studies [15,18], only one [18] contributed data to episodic memory outcomes. A total of 62 data points were included in the overall meta-analysis model for episodic memory. The number of data points exceeds the number of RCTs because most studies reported relevant data for multiple dose levels or memory tests. The overall model included all dose levels and all subjects, regardless of cognitive status at baseline (See Supporting Information—[S1 Fig.](#)). The overall model and the analysis of episodic memory in response to DHA/EPA supplementation among adults with no cognitive complaints at baseline was not significant ([Table 2](#)). Based on visual inspection of the funnel plot, publication bias was not apparent. Furthermore, statistical tests did not indicate the presence of publication bias (Egger's regression  $p$ -value  $> 0.05$ , no studies were imputed on either side of the effect size based on the trim and fill method).

In the *a priori* meta-analysis model of adults with MMC, episodic memory significantly ( $P < .004$ ) improved in response to DHA supplementation, alone or in combination with EPA ([Fig. 2](#); [Table 2](#)). Regardless of cognitive status, combined DHA/EPA supplementation of  $> 1$  g/day improved episodic memory ([Fig. 3](#); [Table 2](#)) and there was a trend ( $P < .058$ ) for episodic memory improvement in response to supplementation in subjects 45 years or older ([Table 2](#)). Based on prior meta-analytical results reported by Mazereeuw and co-workers [8], *a priori*

**Table 1. Characteristics of Human Intervention Trials included in Meta-analysis.**

| Study                       | Country           | Baseline Cognitive Status <sup>a</sup> | Total Subjects Enrolled | Age Range (y) | Duration (days) | TRT <sup>b</sup>           | DHA/EPA (g) | DHA (g) | EPA (g) |
|-----------------------------|-------------------|----------------------------------------|-------------------------|---------------|-----------------|----------------------------|-------------|---------|---------|
| Benton, 2013 [15]           | UK                | NCC                                    | 285                     | 18–25         | 50              | DHA algal oil              | 0.4         | 0.4     | 0       |
| Dangour, 2010 [16]          | England and Wales | NCC                                    | 867                     | 70–79         | 730             | Fish Oil                   | 0.7         | 0.5     | 0.2     |
| Karr, 2012 [17]             | US                | NCC                                    | 43                      | 18–25         | 28              | Fish Oil                   | 1.2         | 0.48    | 0.72    |
| Kotani, 2006 [18]           | Japan             | MMC                                    | 21                      | >60           | 90              | Aravita dietary supplement | 0.12        | 0.12    | NR      |
| Lee, 2013 [19]              | Malaysia          | MMC                                    | 36                      | >60           | 365             | DHA-rich fish oil          | 1.75        | 1.3     | 0.45    |
| Jackson DHA, 2012 [20]      | UK                | NCC                                    | 159                     | 18–35         | 84              | DHA-rich fish oil          | 0.54        | 0.45    | 0.09    |
| Jackson EPA, 2012 [20]      | UK                | NCC                                    | 159                     | 18–35         | 84              | Fish oil                   | 0.5         | 0.2     | 0.3     |
| Johnson, 2008 [21]          | US                | NCC                                    | 57                      | 60–80         | 120             | DHA Algal Oil              | 0.8         | 0.8     | NR      |
| Richter, 2010 [22]          | Israel            | MMC                                    | 8                       | >60           | 42              | PS-DHA                     | .037        | 0.025   | 0.012   |
| Sinn EPA, 2011 [23]         | Australia         | MMC                                    | 54                      | >65           | 180             | EPA-rich fish oil          | 1.83        | 0.16    | 1.67    |
| Sinn DHA, 2011 [23]         | Australia         | MMC                                    | 54                      | >65           | 180             | DHA-rich fish oil          | 1.95        | 1.55    | 0.4     |
| Stonehouse, 2013 [24]       | New Zealand       | NCC                                    | 228                     | 18–45         | 180             | DHA-rich fish oil          | 1.33        | 1.16    | 0.17    |
| Stough, 2012 [25]           | UK                | NCC                                    | 112                     | 45–80         | 90              | DHA-rich fish oil          | 0.312       | 0.25    | 0.06    |
| Vakapova, 2010 [26]         | Israel            | MMC                                    | 157                     | 50–90         | 105             | PS-DHA                     | 0.079       | 0.06    | 0.019   |
| Van de Rest < 1g, 2008 [27] | Netherlands       | NCC                                    | 302                     | >65           | 182             | Fish oil                   | 0.402       | 0.176   | 0.226   |
| Van de Rest >1g, 2008 [27]  | Netherlands       | NCC                                    | 302                     | >65           | 182             | Fish oil                   | 1.94        | 0.847   | 1.093   |
| Witte, 2014 [28]            | Germany           | NCC                                    | 40                      | 50–75         | 182             | Fish oil                   | 2.2         | 0.88    | 1.32    |
| Yurko-Mauro, 2010 [29]      | US                | MMC                                    | 485                     | >55           | 168             | DHA-S Algal Oil            | 0.9         | 0.9     | ≤1%     |

<sup>a</sup>NCC—no cognitive complaints; MMC—mild memory complaint;

<sup>b</sup>TRT—treatment; DHA—docosahexaenoic acid; ARA—arachidonic acid; EPA—eicosapentaenoic acid; PS-DHA—phosphatidylserine-docosahexaenoic acid;

doi:10.1371/journal.pone.0120391.t001

analyses of immediate recall tests were conducted. Immediate recall was significantly ( $P < .012$ ) improved in response to supplementation in adults with MMC at baseline (Table 2). The effects of DHA/EPA supplementation were relatively consistent within meta-analysis models and in various sub-group analyses as demonstrated by non-significance in tests of heterogeneity. As most studies examined the role of DHA-rich supplements, post-hoc sub-group analyses were conducted to determine if a particular dose of DHA was associated with episodic memory improvement. DHA intake above the mean DHA level studied (580 mg/day) significantly improved episodic memory in all subjects ( $P < .009$ ) and in subjects with MMC ( $P < .019$ ) (Table 2). This effect appears to be largely driven by studies providing between 501–999 mg DHA daily (Table 2).

The absolute effect “within” an exposure group is important to determine whether the supplement provides a benefit independent of a comparator. The absolute within group difference

**Table 2. Summary of DHA/EPA<sup>a</sup> Supplementation and Episodic Memory Outcomes in Adults.**

| Between Group                 | # Data Points | WGMD <sup>b</sup> | Z-score      | p-Value Z-score | p-H   | Hedge's g WGMD | Hedge's Z-score | p-Value Hedge's Z | p-H <sup>c</sup> |
|-------------------------------|---------------|-------------------|--------------|-----------------|-------|----------------|-----------------|-------------------|------------------|
| Overall                       | 62            | 0.08              | 1.777        | 0.076           | 0.478 | 0.03           | 1.647           | 0.1               | 0.524            |
| All NCC <sup>d</sup>          | 44            | 0.029             | 0.511        | 0.609           | 0.842 | 0.000          | 0.012           | 0.99              | 0.853            |
| All MMC <sup>e</sup>          | 18            | <b>0.234</b>      | <b>1.932</b> | <b>0.053</b>    | 0.093 | <b>0.114</b>   | <b>2.86</b>     | <b>0.004</b>      | 0.311            |
| Age ≤45 years                 | 19            | -0.006            | -0.044       | 0.965           | 0.149 | -0.012         | -0.251          | 0.802             | 0.165            |
| Age >45 years                 | 43            | 0.092             | 1.861        | 0.063           | 0.715 | 0.039          | 1.897           | 0.058             | 0.767            |
| DHA+EPA ≤1g                   | 43            | 0.054             | 1.090        | 0.277           | 0.428 | 0.018          | 0.896           | 0.37              | 0.442            |
| DHA+EPA >1g                   | 19            | 0.213             | 1.810        | 0.070           | 0.563 | <b>0.096</b>   | <b>2.057</b>    | <b>0.04</b>       | 0.686            |
| Immediate Recall—all          | 20            | 0.094             | 1.130        | 0.257           | 0.570 | 0.010          | 0.328           | 0.743             | 0.512            |
| Immediate Recall—NCC          | 13            | -0.063            | -0.557       | 0.577           | 0.830 | -0.029         | -0.861          | 0.389             | 0.864            |
| Immediate Recall—MMC          | 7             | <b>0.274</b>      | <b>2.250</b> | <b>0.024</b>    | 0.448 | <b>0.173</b>   | <b>2.501</b>    | <b>0.012</b>      | 0.627            |
| <b>Within Group</b>           | 67            | <b>0.844</b>      | <b>7.180</b> | <b>0.000</b>    | 0.000 | <b>0.224</b>   | <b>5.903</b>    | <b>0.000</b>      | 0.000            |
| All NCC                       | 44            | <b>0.534</b>      | <b>4.871</b> | <b>0.000</b>    | 0.000 | <b>0.189</b>   | <b>4.757</b>    | <b>0.000</b>      | 0.000            |
| All MMC                       | 23            | <b>1.967</b>      | <b>5.989</b> | <b>0.000</b>    | 0.000 | <b>0.338</b>   | <b>3.784</b>    | <b>0.000</b>      | 0.000            |
| Age ≤45 years                 | 19            | <b>0.67</b>       | <b>2.949</b> | <b>0.003</b>    | 0.000 | <b>0.213</b>   | <b>2.922</b>    | <b>0.003</b>      | 0.000            |
| Age >45 years                 | 48            | <b>0.911</b>      | <b>6.55</b>  | <b>0.000</b>    | 0.000 | <b>0.226</b>   | <b>5.125</b>    | <b>0.000</b>      | 0.000            |
| DHA+EPA Intakes ≤1g           | 48            | <b>0.719</b>      | <b>5.493</b> | <b>0.000</b>    | 0.000 | <b>0.182</b>   | <b>4.080</b>    | <b>0.000</b>      | 0.000            |
| DHA+EPA Intakes >1g           | 19            | <b>1.362</b>      | <b>4.935</b> | <b>0.000</b>    | 0.000 | <b>0.329</b>   | <b>5.629</b>    | <b>0.000</b>      | 0.000            |
| Immediate Recall—all          | 21            | <b>1.663</b>      | <b>5.614</b> | <b>0.000</b>    | 0.000 | <b>0.299</b>   | <b>4.523</b>    | <b>0.000</b>      | 0.000            |
| Immediate Recall—NCC          | 13            | <b>1.078</b>      | <b>3.734</b> | <b>0.000</b>    | 0.000 | <b>0.241</b>   | <b>3.439</b>    | <b>0.001</b>      | 0.000            |
| Immediate Recall—MMC          | 8             | <b>2.926</b>      | <b>3.117</b> | <b>0.002</b>    | 0.000 | <b>0.486</b>   | <b>2.756</b>    | <b>0.006</b>      | 0.000            |
| <b>Dose Subgroup analysis</b> |               |                   |              |                 |       |                |                 |                   |                  |
| DHA <580 mg                   | 34            | 0.037             | 0.480        | 0.631           | 0.333 | 0.003          | 0.136           | 0.892             | 0.358            |
| DHA >580 mg                   | 28            | 0.108             | 1.846        | 0.065           | 0.606 | <b>0.079</b>   | <b>2.596</b>    | <b>0.009</b>      | 0.819            |
| DHA >580 mg NCC               | 18            | 0.063             | 0.704        | 0.481           | 0.982 | 0.036          | 0.745           | 0.456             | 0.984            |
| DHA >580 mg MMC               | 10            | 0.203             | 1.402        | 0.161           | 0.050 | <b>0.117</b>   | <b>2.345</b>    | <b>0.019</b>      | 0.212            |
| DHA ≤250 mg                   | 18            | 0.065             | 0.491        | 0.623           | 0.338 | 0.014          | 0.288           | 0.773             | 0.359            |
| DHA 251–500 mg                | 16            | 0.018             | 0.188        | 0.851           | 0.320 | -0.001         | -0.023          | 0.981             | 0.333            |
| DHA 501–999 mg                | 19            | 0.096             | 1.497        | 0.134           | 0.844 | <b>0.071</b>   | <b>2.077</b>    | <b>0.038</b>      | 0.937            |
| DHA 1 g+                      | 9             | 0.238             | 1.048        | 0.295           | 0.144 | 0.128          | 1.592           | 0.111             | 0.255            |

<sup>a</sup>DHA/EPA = docosahexaenoic acid alone or in combination with eicosapentaenoic acid;

<sup>b</sup>WGMD = weighted group mean difference;

<sup>c</sup>p-H = p-value for heterogeneity test;

<sup>d</sup>NCC = subjects without cognitive complaints at baseline;

<sup>e</sup>MMC = subjects with mild memory complaints at baseline. Bold text indicates statistically significant result.

doi:10.1371/journal.pone.0120391.t002

was statistically significant for all episodic memory models examined (Table 2). These within group absolute differences substantiate the findings from the between group analyses and support a beneficial effect of DHA/EPA for episodic memory.

Fifteen data points were included in the overall meta-analysis model for semantic memory. No significant effects of DHA/EPA supplementation were found for any of the between group models analyzed (See Supporting Information—S3 Table). However, significant improvements



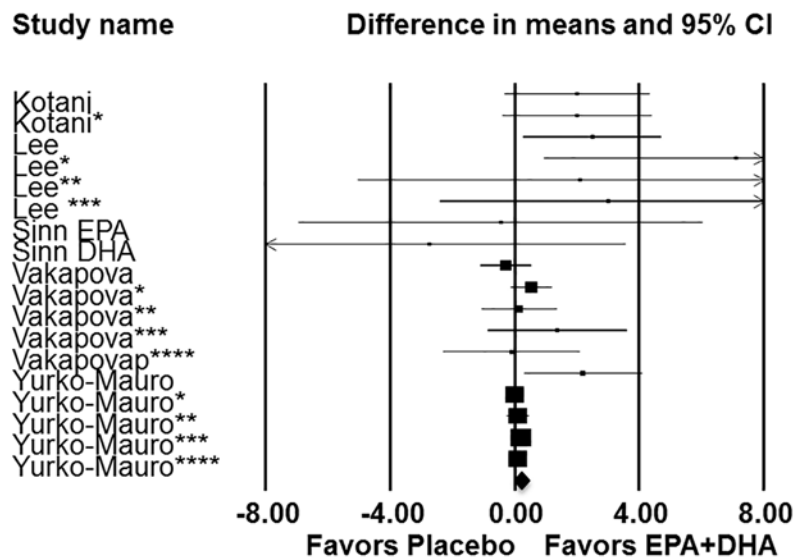

**Fig 2. Forest plot with meta-analysis of episodic memory data.** Episodic memory data from pertinent human intervention studies ( $n = 5$ ) of DHA supplementation in adults with mild memory complaints. \*Asterisks denote study included more than one test of episodic memory, results for each episodic memory test within a given study represented individually. Summary statistics are as follows  $z = 1.932$  ( $p = 0.053$ ); Hedge's  $g z = 2.86$  ( $p = 0.004$ ).

doi:10.1371/journal.pone.0120391.g002

from baseline were observed in the overall within group analyses. The models of semantic memory improvements from baseline in adults older than 45 and those supplemented with more than 1 g DHA+EPA daily were also statistically significant (See Supporting Information—S3 Table). Based on visual inspection of the funnel plot and Egger's regression test, publication bias was not apparent for studies of semantic memory.

Twenty-one data points were included in the overall meta-analysis model for working memory. No significant effects of DHA/EPA supplementation were found for any of the between

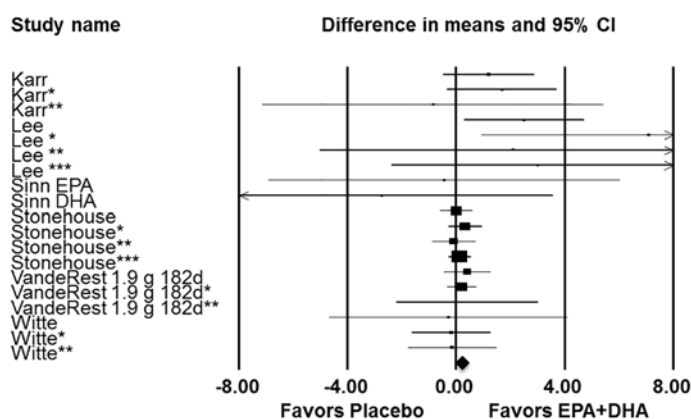

**Fig 3. Forest plot with meta-analysis of dose and episodic memory.** Episodic memory data from pertinent human intervention studies ( $n = 6$ ) of DHA supplementation alone or in combination with EPA  $> 1g$  in all adults. \*Asterisks denote study included more than one test of episodic memory, results for each episodic memory test within a given study represented individually. Summary statistics are as follows  $z = 1.81$  ( $p = 0.070$ ); Hedge's  $g z = 2.05$  ( $p = 0.04$ ).

doi:10.1371/journal.pone.0120391.g003

group models analyzed (See Supporting Information—[S4 Table](#)). Significant improvement from baseline in working memory outcomes ( $P < .027$ ) was observed in the within group analyses. The models of working memory improvements from baseline in adults older than 45 and those supplemented with more than 1 g DHA+EPA daily were also statistically significant ( $P < .028$ ;  $P < .001$ , respectively). Based on visual inspection of the funnel plot and Egger's regression test, publication bias was also not apparent for studies of working memory.

## Observational Studies Summary

A complete summary of the results from observational studies is available in [Table 3](#). Only two observational studies [[31,36](#)] examined the association between DHA/EPA blood levels and memory outcomes in younger populations. Consistent with the current meta-analysis results for younger adults (i.e.,  $<45$  years), De Groot et al. [[31](#)] did not find an association between higher DHA status and tests of episodic memory. In contrast, Muldoon et al [[36](#)] showed that higher serum phospholipid DHA was associated with better performance on nonverbal reasoning, logical memory, and working memory in healthy middle-aged adults ages 30–54 (mean age =  $44.6 \pm 6.7$ ). Overall, results from observational studies support a broad role of DHA/EPA status and improved cognitive outcomes in older adults ( $\geq 45$  years). Most observational studies reporting the association between DHA/EPA blood levels and memory outcomes found improvements between these fatty acids and at least one memory type or other cognitive outcome. Beydoun and co-workers [[30](#)] reported a beneficial association between plasma DHA/EPA and semantic memory function. Tan and co-workers [[39](#)] reported a beneficial association between erythrocyte DHA and visual but not verbal episodic memory. Titova and co-workers [[40](#)] found a positive association between dietary DHA/EPA and composite cognitive scores (including a memory component), and Phillips and co-workers [[37](#)] found a significant association between both plasma and DHA/EPA dietary intake and composite memory scores. Four studies found no association between either DHA/EPA blood levels [[32,35](#)] or dietary intake [[33,34](#)] and memory function in older adults, but reported benefits of higher DHA/EPA status to processing speed [[32,33](#)] and subject-reported cognitive complaints [[34,35](#)]. Finally, among studies reporting APOE  $\epsilon 4$  status, Samieri et al. [[38](#)] reported a positive association between plasma DHA and working memory in ApoE4 positive subjects and Whalley and co-workers [[42](#)] found higher erythrocyte DHA/EPA levels associated with higher scores on tests of immediate recall in APOE  $\epsilon 4$  negative participants [[41](#)].

## Discussion

Memory is divided into two general types, declarative and non-declarative. Declarative memory relates to the conscious recollection of facts and events and can be further sub-divided into episodic and semantic [[43](#)]. Episodic memory is memory for personally experienced events that occur at a specific place and time and is measured by memory of stories, word lists, or figures [[43](#)]. Episodic memory typically declines throughout life and is consistent with normal, healthy aging decline [[43](#)]. Aging adults are concerned with memory loss, even more so than with cardiovascular health or physical activity [[44](#)]. The current meta-analysis results with DHA suggest a benefit of supplementation in improving episodic memory function in healthy adults with MMC and are consistent with those of Mazereeuw and co-workers [[8](#)] for improvements in the immediate recall sub-category of episodic memory. The strength and uniqueness of the current meta-analysis approach is that it allows demonstration of DHA/EPA improvements across a variety of individual memory tests within the category of episodic memory not otherwise noticeable in a composite of memory outcomes. The studies included in this meta-analysis varied in sample size and demographics (e.g. age, gender, education) as well as

**Table 3. Summary of Results from Relevant Observational Studies Regarding DHA/EPA Status and Memory Outcomes.**

| Study                  | Memory Outcome (Test)                                                                                      | Observation                                                                                                                                                                                                                                                                                                                                                                                     | Conclusion                                                                                                                                                                                                                                                                                                                                                                                                                                                                                                                            |
|------------------------|------------------------------------------------------------------------------------------------------------|-------------------------------------------------------------------------------------------------------------------------------------------------------------------------------------------------------------------------------------------------------------------------------------------------------------------------------------------------------------------------------------------------|---------------------------------------------------------------------------------------------------------------------------------------------------------------------------------------------------------------------------------------------------------------------------------------------------------------------------------------------------------------------------------------------------------------------------------------------------------------------------------------------------------------------------------------|
| Beydoun, 2007 [30]     | Recent Memory (DWRT) <sup>a</sup>                                                                          | No effect was observed on delayed word recall among any of the subgroups considered.                                                                                                                                                                                                                                                                                                            | "Promoting higher intakes of n-3 HUFAs <sup>b</sup> in the diet of hypertensive and dyslipidemic persons may have substantial benefits in reducing their risk of cognitive decline in the area of verbal fluency. However, clinical trials are needed to confirm this finding."                                                                                                                                                                                                                                                       |
| de Groot, 2007 [31]    | Memory (Visual Verbal Word Learning Tasks)                                                                 | WLTtot <sup>c</sup> (# words)* and WLTdr <sup>d</sup> (# words) were significantly different between baseline and 22 weeks (P < 0.05). Performances on WLTtot (P = 0.002), WLTdr (P = 0.014) were significantly better at 22 week.                                                                                                                                                              | "In conclusion, this study provides a preliminary indication that a higher DHA <sup>e</sup> status might be associated with slower learning curves. However, additional studies are necessary."                                                                                                                                                                                                                                                                                                                                       |
| Dullemeijer, 2007 [32] | Memory Z-Score (Immediate & delayed recall)                                                                | "Participants improved on memory over 3y; the mean (± SD) 3-year change in z scores was 0.34 ± 0.73 for memory, because of procedural learning effects."                                                                                                                                                                                                                                        | In older Dutch adults, higher plasma n-3 PUFA were not associated with less decline in 3-year word fluency                                                                                                                                                                                                                                                                                                                                                                                                                            |
| Kalmijn, 2004 [33]     | Memory Function Z-Scores (Total, maximal, & delayed recall scores for Verbal Learning Test were averaged.) | Adjusted OR* for risk of impaired memory function (lowest 10%) according to one SD increase in fatty fish or fatty acid intake. EPA + DHA 1.01 (0.85–1.20) Fatty Fish 0.95 (0.80–1.13) *OR <sup>h</sup> (95% CI) adjusted for age, sex, education, alcohol, smoking, & total energy intake                                                                                                      | "Fatty fish and marine omega-3 PUFA <sup>i</sup> consumption was associated with a reduced risk . . . of impaired cognitive function in this middle-aged population."                                                                                                                                                                                                                                                                                                                                                                 |
| Kesse-Guyot, 2011 [34] | Memory Test (5-word test of immediate & delayed verbal memory including free & cued recall)                | No significant association between poor scores on the MMSE <sup>j</sup> and 5-word cognitive tests and intake of fish and related fatty acids."                                                                                                                                                                                                                                                 | "Cognitive complaints, which may be an early indicator of cognitive decline, are less frequent among the elderly who have a high long-chain n-3 acids intake, as assessed 13 years earlier."                                                                                                                                                                                                                                                                                                                                          |
| Milte, 2011 [35]       | Immediate Memory (RAVLT) <sup>p</sup>                                                                      | Higher levels of the n-6 PUFAs DGLA, AA, DPA and lower levels of the n-3 PUFAs EPA and DPA were associated with poorer performance on various cognitive assessments and self-reported scales. In addition, lower levels of various n-3 PUFAs were associated with higher levels of n-6 PUFAs, including n-6 DPA."                                                                               | "Despite limitations, this study adds to the growing evidence of a possible role of PUFAs in memory problems and mood in the elderly. It points to differences in n-3 and n-6 PUFA status in adults with MCI compared with healthy controls. It also provides evidence of associations between higher n-6 DPA status and poorer cognition, memory and perception of health, which are modulated by depressive symptoms. It suggests that modification of PUFA intakes may positively affect mood and memory in adults with MCI . . ." |
| Muldoon, 2010 [36]     | General / Episodic Memory & Working Memory (WMS-3) <sup>q</sup>                                            | Higher DHA blood levels were associated with better scores on tests of working memory. In contrast, EPA was marginally associated (P = 0.054) only with working memory.                                                                                                                                                                                                                         | "The findings in this report suggest that DHA may be the (n-3) fatty acid most closely related to cognitive function."                                                                                                                                                                                                                                                                                                                                                                                                                |
| Phillips, 2012 [37]    | Composite Memory Score                                                                                     | "In this model* plasma PC EPA and DHA, and dietary omega-3 intake score were all positive predictors of the composite memory performance score." *Controlling for age, years of education, IMDs, and sex.                                                                                                                                                                                       | "These results are consistent with the possibility that omega-3 fatty acid nutrition has an impact on cognitive decline, but could equally be explained by dietary changes that occurred after onset of cognitive decline. It is also possible that the results could be explained by unknown confounding factors."                                                                                                                                                                                                                   |
| Samieri, 2011 [38]     | Working Memory (BVRT) <sup>t</sup>                                                                         | A significant interaction was found between plasma DHA proportion and the ApoE-ε4 <sup>u</sup> on the change of BVRT scores over time (p = 0.02). A 1-SD increase in plasma DHA was not associated with the evolution of BVRT performances over time in ApoE-ε4 non-carriers, but strongly related to slower decline on BVRT performances in ApoE-ε4 carriers (β = 0.061 (SD = 0.024, p = .01). | "Plasma DHA was associated with slower decline on BVRT performances in ApoE- ε 4 carriers only. EPA and DHA may contribute to delaying decline in visual working memory in ApoE- ε 4 carriers. In older depressed subjects, EPA, but not DHA, may slow cognitive decline."                                                                                                                                                                                                                                                            |
| Tan 2012 [39]          | Verbal Memory (LM-d) <sup>v</sup> ; Visual Memory (VR-d) <sup>w</sup>                                      | RBC <sup>x</sup> DHA levels showed a continuous positive association with performance in tests of visual memory (VR-d). There was no statistically significant relationship between RBC DHA and performance on verbal memory (LM-d).                                                                                                                                                            | "Lower RBC DHA levels are associated with smaller brain volumes and a 'vascular' pattern of cognitive impairment even in persons free of clinical dementia."                                                                                                                                                                                                                                                                                                                                                                          |
| Titova, 2013 [40]      | Declarative Memory—7 minute screening (ECR) <sup>y</sup>                                                   | The dietary intake of EPA and DHA was positively linked to the 7MS <sup>z</sup> score (i.e., the total score obtained on 4 cognitive subtests, 1 of which was the ECR). This association remained significant in all models. However, there were no associations between plasma EPA or DHA with the performance on the 7MS estimates.                                                           | "Study results provide a potential link between diets rich in EPA & DHA & enhanced mental health in the elderly."                                                                                                                                                                                                                                                                                                                                                                                                                     |

(Continued)

Table 3. (Continued)

| Study              | Memory Outcome (Test)                 | Observation                                                                                                                                                                                                                  | Conclusion                                                                                                                                                                                                                                                                                                                                       |
|--------------------|---------------------------------------|------------------------------------------------------------------------------------------------------------------------------------------------------------------------------------------------------------------------------|--------------------------------------------------------------------------------------------------------------------------------------------------------------------------------------------------------------------------------------------------------------------------------------------------------------------------------------------------|
| Whalley, 2004 [41] | Immediate Memory (AVLT) <sup>aa</sup> | Pearson's correlation coefficients between AVLT scores and log-transformed RBC LCPUFAs <sup>bb</sup> content was not statistically significant.                                                                              | Total RBC n-3 FA & ratio of DHA to AA was associated with better cognitive function in late life before and after adjustment for childhood IQ. "If associations with n-3 content are causal, optimization of n-3 and n-6 fatty acid intakes could improve retention of cognitive function in old age."                                           |
| Whalley, 2008 [42] | Immediate Memory (AVLT)               | DHA was associated with significantly ( $P < 0.001$ ) higher scores on AVLT. DHA also had a differential effect over time ( $P < 0.001$ ): AVLT was significantly ( $P < 0.001$ ) lower at wave 1 and wave 2 than at wave 3. | Cognitive benefits were associated with higher erythrocyte n-3 PUFA content but were significant only in the absence of the APOE ε4 allele. "These data are evidence of a gene X environment interaction for cognitive aging. They are relevant to the analysis of trials of n-3 PUFA supplements in cognitive aging and dementia prevention..." |

<sup>a</sup>DWRT = Delayed Word Recall Test;

<sup>b</sup> HUFAs = highly unsaturated fatty acids;

<sup>c</sup> WLTtot = Word Learning Task total;

<sup>d</sup> WLTdr = Word Learning Tasks delayed recall;

<sup>e</sup> DHA = Docosahexaenoic Acid;

<sup>f</sup> SD = Standard Deviation;

<sup>g</sup> EPA = Eicosapentaenoic Acid;

<sup>h</sup> OR = Odds Ratio

<sup>i</sup> PUFA = Polyunsaturated Fatty Acids;

<sup>j</sup> BMI = body mass index;

<sup>k</sup> CES-D = Center for Epidemiologic Studies Depression Scale (CES-D);

<sup>l</sup> MMSE = Mini-Mental State Examination;

<sup>m</sup> MCI = mild cognitive impairment;

<sup>n</sup> DGLA = digamma linoleic acid;

<sup>o</sup>; AA—Arachidonic Acid;

<sup>p</sup> RAVLT = Rey Auditory Verbal Learning Test;

<sup>q</sup> WMS-3 = Wechsler Memory Scale, 3<sup>rd</sup> ed.;

<sup>r</sup> PC = Phosphatidylcholine;

<sup>s</sup> IMD = Index of Multiple Deprivation;

<sup>t</sup> BVRT = Benton Visual Retention Test;

<sup>u</sup> APOE ε4 = Apolipoprotein E Allele 4;

<sup>v</sup> LM-d = Logical Memory test—delayed;

<sup>w</sup> VR-d = Visual Reproduction test delayed recall;

<sup>x</sup> RBC = Red Blood Cell;

<sup>y</sup> ECR = Enhanced Cued Recall;

<sup>x</sup>7MS = 7-Minute Scoring of the ECR;

<sup>aa</sup> AVLT = Rey Auditory Verbal Learning Test;

<sup>bb</sup> LCPUFA = Long-chain Polyunsaturated Fatty Acids;

doi:10.1371/journal.pone.0120391.t003

duration of supplementation, yet the effect of DHA/EPA supplementation across these studies was significant. Examining the data in this manner also allowed for the observation of additional relationships, in particular, the role of DHA/EPA dose in memory improvement. While Mazereeuw et al. [8] did not find an association of dose on the treatment effect size for a single test of episodic memory, i.e. immediate recall, the current analysis found that multiple tests for episodic memory, regardless of cognitive status (MMC and NCC combined,  $n = 19$  data points), demonstrated an improvement in performance from at least 1 g/d of DHA+EPA. Data showed that this benefit is apparently driven by DHA, in particular, at a level between 501–999 mg/day. Data were likely insufficient to evaluate doses of DHA >1 g, as only 9 data points were available from studies providing this dose range. Discrepancies between our meta-analysis

findings and 2 recent meta-analyses are likely due to differences in designs and criteria for combining studies on n-3 LCPUFA and cognition. Jiao and co-workers [45] examined studies across wide age ranges, i.e. infancy to elderly and did not provide appropriate sub-group analyses by age or dose. This approach is problematic as cognitive assessment is dependent upon brain development milestones in the young and is not pertinent to older adults, and use of such wide doses within a single analysis makes meaningful interpretation of results difficult. The meta-analysis by Abubakari and co-workers [7] combined studies of healthy adults with disease populations (e.g. AD, depression, schizophrenia) and thus included a large array of cognitive tests. Heterogeneity of baseline cognitive function across these populations and varied sensitivity of assessments may have obscured important between group differences for DHA/EPA supplementation versus placebo.

The direct role of diet in the modulation of DHA content in specific regions of the brain at key points during the lifecycle is likely an important contributor to memory development and continued normal memory function. Evidence from human autopsy supports a rapid accretion of DHA throughout early development [46, 47] to 18 years of age, then a continuous but more gradual accumulation of DHA in cerebral cortex fatty acids in adulthood [46,47]. Specifically, evidence supports roughly 10% concentration of DHA in normal human cerebral cortex tissue at birth that increases progressively to about 27% by 16 years of age [46,48]. The hippocampus, in particular, is essential for memory function. Dietary deficiency and repletion of DHA in the cerebral cortex of neonates and adults (both young and old), particularly in the frontal cortex, and hippocampus has been demonstrated in rodents [49, 50] and non-human primates [51]. However, in humans both cerebral cortex and hippocampal volume have been shown to decrease with age and memory loss, as recently demonstrated [52]. In a cohort of healthy, MCI and AD subjects combined (with or without ApoE4<sup>+</sup> genotype), significant decreases in hippocampal and cerebral cortex grey matter volume were found [52]. Yet among fish oil supplement users in this cohort, less cerebral cortex and hippocampal atrophy was shown compared to non-users and this relationship was particularly significant for the ApoE4<sup>-</sup> genotype. Fish oil supplement users with normal cognitive function and those with the ApoE4<sup>-</sup> genotype also showed significant associations with global cognitive tests (ADAS-Cog and MMSE) at any point in time during DHA/EPA use, suggesting that maintaining brain DHA/EPA content throughout adulthood may help prevent functional cognitive declines with aging.

From a mechanistic view, in early life, animal studies support a direct role of DHA in neurogenesis, synaptogenesis, and myelination [50]. DHA modulation of hippocampal neurons, both *in vitro* and *in vivo* from neonatal animals, supports its role in growth and maturation that likely contributes to improvements in performance of memory-related tasks such as the Morris water maze [50]. Recent recognition of the existence of adult neural stem cells and the ability of these cells to support neurogenesis in adulthood supports the possibility that DHA plays a continuous role in hippocampal maintenance that supports memory function throughout life [53]. DHA and EPA have both been found to directly impact neuronal differentiation in cultured rat neural stem cells through separate but complementary mechanisms [54]. Aged animal models (e.g. SAMP8 mouse, and aged rats) show depleted levels of DHA in brain whereas DHA supplementation restores not only brain phospholipid containing DHA levels, but improves learning and memory retention on tasks such as Morris water maze, radial arm maze, and T-maze avoidance [55,56, 57]. These preclinical models demonstrate the important role that DHA serves in not only brain development but also in maintaining cognitive function in aging.

In our meta-analysis, lack of an apparent relationship between episodic memory and DHA/EPA supplementation among adults with no cognitive complaints at baseline may be related to several factors. It has been hypothesized that the cognitive benefits of n-3 LCPUFA

supplementation are not detectable in people with a high cognitive reserve or that the neuroprotection supported by DHA requires treatment in proximity of cognitive decline to detect a benefit [4]. Variability in subjects' cognitive function and a lack of consistent screening tests with cut-offs for baseline memory scores may also contribute to null findings in some clinical studies of n-3 LCPUFA supplementation of older adults. Disparities in dietary intake and subsequent blood levels of n-3 LCPUFA at baseline may also contribute to limited findings. Observational data suggests that risk of cognitive decline may be greatest in populations with lower n-3 LCPUFA intakes [3,4].

In contrast to intervention trials, associations reported in our systematic review of observational trials were not limited to episodic memory improvements but included benefits to working, semantic, and composite memory scores as well. An association between DHA/EPA and semantic and working memory likely reflects the long-term follow-up of subjects in observational trials. Declines in semantic and working memory reflect later stages of cognitive decline [12] and likely require study in excess of the average 4–6 months of intervention studies reviewed herein to recognize benefits.

## Limitations

The quality of the included intervention studies was reasonable. Studies rated as having a high risk of bias were few but may have affected the reliability of the meta-analysis. Only 1 [18] of 3 [15,18,22] studies with a high risk of bias contributed episodic memory data. The combining of various tests into specific memory types was completed by a third party cognition expert but all experts may not agree upon which tests measure which type of memory. Finally, while every effort was made to only include studies of healthy subjects, either with no or only mild cognitive complaints, it is possible that some study populations may have included subjects with undiagnosed pre-dementia. Insufficient data are available from current RCTs to assess the interaction between gender, age, and APOE status on cognitive outcomes following DHA/EPA supplementation. It has been proposed by Stonehouse that, “. . . if dimorphisms exist for any of these factors, potential effects may be diluted or cancelled out resulting in biased results” [58].

## Conclusions

DHA supplementation, alone or in combination with EPA, is associated with improved episodic memory in adults with mild memory complaints. The meta-analytic results demonstrate a significant impact on age-associated memory loss which is a major health concern of older adults. Additional long-term intervention studies examining the role that DHA/EPA may play in semantic and working memory outcomes in aging individuals are needed. Observational data support a broad role of DHA/EPA intake and its positive effects on memory and cognition in older adults.

## Supporting Information

**S1 Checklist. Completed PRISMA Checklist.**

(DOC)

**S1 Fig. Forest plot with meta-analysis of episodic memory in response to DHA supplementation in all adults.**

(PPTX)

**S1 Search Strategy. Electronic Search Strategy for Ovid Medline.**

(DOCX)

**S1 Table. Memory Types Assigned to Outcomes in Published Studies.**

(DOCX)

**S2 Table. Characteristics of Observational Studies Reporting DHA/EPA Status and Memory Outcomes.**

(DOCX)

**S3 Table. Summary of DHA/EPA Supplementation and Semantic Memory Outcomes in Adults.**

(DOCX)

**S4 Table. Summary of DHA/EPA Supplementation and Working Memory Outcomes in Adults.**

(DOCX)

## Acknowledgments

The authors wish to thank Roberta D. Higgins, consultant to DSM Nutritional Products and employee of MedDetect, Inc., for help with literature screening and data extraction. The authors also wish to thank Paul Bloomquist of the Denver Health Sciences Library for assistance with literature searches. The authors also thank Charli Weatherford for quality control review of extracted data.

## Author Contributions

Conceived and designed the experiments: KYM DA MVE. Performed the experiments: MVE. Analyzed the data: DA. Wrote the paper: KYM DA MVE.

## References

1. EFSA NDA Panel (EFSA Panel on Dietetic Products, Nutrition and Allergies). Scientific Opinion on the essential composition of infant and follow-on formulae. *EFSA J.* 2014; 12: 37602–3866.
2. Noel K, Hoffman J, Ellis L, Yurko-Mauro K, Cella C, Sercus B, et al. DHA and cognitive function in the elderly: a systematic review of the literature. *Res Pract Alz Disease.* 2006; 11: 381–387.
3. Solfrizzi V, Frisardi V, Capurso C, D'Introno A, Colacicco AM, Vendemiale G, et al. Dietary fatty acids and predementia syndromes. *Sci World J.* 2009; 9: 792–810.
4. Dacks PA, Shineman DW, Fillit HM. Current evidence for the clinical use of long-chain polyunsaturated n-3 fatty acids to prevent age-related cognitive decline and Alzheimer's disease. *J Nutr Health Aging.* 2013; 17: 240–251. doi: [10.1007/s12603-012-0431-3](https://doi.org/10.1007/s12603-012-0431-3) PMID: [23459977](https://pubmed.ncbi.nlm.nih.gov/23459977/)
5. Sydenham E, Dangour AD, Lim WS. Omega 3 fatty acid for the prevention of cognitive decline and dementia. *Cochrane Database of Systematic Reviews.* 2012; 6: CD005379. doi: [10.1002/14651858.CD005379.pub3](https://doi.org/10.1002/14651858.CD005379.pub3) PMID: [22696350](https://pubmed.ncbi.nlm.nih.gov/22696350/)
6. Lin PY, Chiu CC, Huang SY, Su KP. A meta-analytic review of polyunsaturated fatty acid compositions in dementia. *J Clin Psych.* 2012; 73: 1245–54.
7. Abubakari AR, Naderali MM, Naderali EK. Omega-3 fatty acid supplementation and cognitive function: are smaller dosages more beneficial? *Inter J Gen Med.* 2014; 7: 463–473.
8. Mazereeuw G, Lanctot KL, Chau SA, Swardfager W, Herrmann N. Effects of omega-3 fatty acids on cognitive performance: a meta-analysis. *Neurobio Aging.* 2012; 33: 17–29.
9. de Jager CA, Dye L, de Bruin EA, Butler L, Fletcher J, Lampaert DJ. Cognitive function: criteria for validation and selection of cognitive tests for investigating the effects of foods and nutrients. *Nutr Rev.* 2014; 72: 162–179. PMID: [24697324](https://pubmed.ncbi.nlm.nih.gov/24697324/)
10. de Jager CA, Milwain E, Budge M. Early detection of isolated memory deficits in the elderly: the need for more sensitive neuropsychological tests. *Psychol Med.* 2002; 32: 483–491. PMID: [11989993](https://pubmed.ncbi.nlm.nih.gov/11989993/)
11. Small SA, Stern Y, Tang M, Mayeux R. Selective decline in memory function among healthy elderly. *Neurology.* 1999; 52: 1392–1396. PMID: [10227623](https://pubmed.ncbi.nlm.nih.gov/10227623/)

12. Dubois B, Feldman HH, Jacova C, Dekosky ST, Barberger-Gateau P, Cummings J, et al. Research criteria for the diagnosis of Alzheimer's disease: revising the NINCDS-ADRDA criteria. *Lancet Neurol*. 2007; 6: 734–746. PMID: [17616482](#)
13. Higgins JPT, Green S. *Cochrane Handbook for Systematic Reviews of Interventions*. Wiley-Blackwell, New Jersey; 2008.
14. Hedges LV, Olkin I. *Statistical methods for meta-analysis*. Academic Press, New York; 1985.
15. Benton D, Donohoe RT, Clayton DE, Long SJ. Supplementation with DHA and the psychological functioning of young adults. *Br J Nutr*. 2013; 109: 155–161. doi: [10.1017/S0007114512000566](#) PMID: [22715808](#)
16. Dangour AD, Allen E, Elbourne D, Fasey N, Fletcher AE, Hardy P, et al. Effect of 2-y n-3 long-chain polyunsaturated fatty acid supplementation on cognitive function in older people: a randomized, double-blind, controlled trial. *Amer J Clin Nutr*. 2010; 91: 1725–1732. doi: [10.3945/ajcn.2009.29121](#) PMID: [20410089](#)
17. Karr JE, Grindstaff TR, Alexander JE. Omega-3 polyunsaturated fatty acids and cognition in a college-aged population. *Exp Clin Psychopharmacol*. 2012; 20: 236–242. doi: [10.1037/a0026945](#) PMID: [22250656](#)
18. Kotani S, Sakaguchi E, Warashina S, Matsukawa N, Ishikura Y, Kiso Y, et al. Dietary supplementation of arachidonic and docosahexaenoic acids improves cognitive dysfunction. *Neurosci Res*. 2006; 56: 159–164. PMID: [16905216](#)
19. Lee LK, Shahar S, Chin AV, Yusoff NAM. Docosahexaenoic acid-concentrated fish oil supplementation in subjects with mild cognitive impairment (MCI): a 12-month randomised, double-blind, placebo-controlled trial. *Psychopharmacol*. 2013; 225: 605–612. doi: [10.1007/s00213-012-2848-0](#) PMID: [22932777](#)
20. Jackson PA, Deary ME, Reay JL, Scholey AB, Kennedy DO. No effect of 12 weeks' supplementation with 1 g DHA-rich or EPA-rich fish oil on cognitive function or mood in healthy young adults aged 18–35 years. *Br J Nutr*. 2012; 107: 1232–1243. doi: [10.1017/S000711451100403X](#) PMID: [21864417](#)
21. Johnson EJ, McDonald K, Caldarella SM, Chung H-Y, Troen AM, Snodderly DM. Cognitive findings of an exploratory trial of docosahexaenoic acid and lutein supplementation in older women. *Nutr Neurosci*. 2008; 11: 75–83. doi: [10.1179/147683008X301450](#) PMID: [18510807](#)
22. Richter Y, Herzog Y, Cohen T, Steinhart Y. The effect of phosphatidylserine-containing omega-3 fatty acids on memory abilities in subjects with subjective memory complaints: a pilot study. *Clin Interv Aging*. 2010; 5: 313–316. doi: [10.2147/CIA.S13432](#) PMID: [21103402](#)
23. Sinn N, Milte CM, Street SJ, Buckley JD, Coates AM, Petkov J, et al. Effects of n-3 fatty acids, EPA v. DHA, on depressive symptoms, quality of life, memory and executive function in older adults with mild cognitive impairment: a 6-month randomised controlled trial. *Br J Nutr*. 2012; 107: 1682–1693. doi: [10.1017/S0007114511004788](#) PMID: [21929835](#)
24. Stonehouse W, Conlon CA, Podd J, Hill SR, Minihane AM, Haskell C, et al. DHA supplementation improved both memory and reaction time in healthy young adults: a randomized controlled trial. *Amer J Clin Nutr*. 2013; 97: 1134–1143. doi: [10.3945/ajcn.112.053371](#) PMID: [23515006](#)
25. Stough C, Downey L, Silber B, Lloyd J, Kure C, Wesnes K, et al. The effects of 90-day supplementation with the omega-3 essential fatty acid docosahexaenoic acid (DHA) on cognitive function and visual acuity in a healthy aging population. *Neurobiol Aging*. 2012; 33: 824.e821–823.
26. Vakhapova V, Cohen T, Richter Y, Herzog Y, Korczyn AD. Phosphatidylserine containing omega-3 fatty acids may improve memory abilities in non-demented elderly with memory complaints: a double-blind placebo-controlled trial. *Dement Geriatr Cogn Disord*. 2012; 29: 467–474. doi: [10.1159/000310330](#) PMID: [20523044](#)
27. van de Rest O, Geleijnse JM, Kok FJ, van Staveren WA, Dullemeijer C, OldeRikkert MGM, et al. Effect of fish oil on cognitive performance in older subjects: a randomized, controlled trial. *Neurology*. 2008; 71: 430–438. doi: [10.1212/01.wnl.0000324268.45138.86](#) PMID: [18678826](#)
28. Witte AV, Kerti L, Hermannstadter HM, Fiebach JB, Schreiber SJ, Schuchardt JP, et al. Long-chain omega-3 fatty acids improve brain function and structure in older adults. *Cereb Cortex*. 2014; 24: 3059–3068. doi: [10.1093/cercor/bht163](#) PMID: [23796946](#)
29. Yurko-Mauro K, McCarthy D, Rom D, Nelson EB, Ryan AS, Blackwell A, et al. Beneficial effects of docosahexaenoic acid on cognition in age-related cognitive decline. *Alzheimer's Dement*. 2010; 6: 456–464.
30. Beydoun MA, Kaufman JS, Satia JA, Rosamond W, Folsom AR. Plasma n-3 fatty acids and the risk of cognitive decline in older adults: the Atherosclerosis Risk in Communities Study. *Am J Clin Nutr*. 2007; 85: 1103–1111. PMID: [17413112](#)



31. de Groot RHM, Hornstra G, Jolles J. Exploratory study into the relation between plasma phospholipid fatty acid status and cognitive performance. *Prostaglandins Leuko Essent Fatty Acids*. 2007; 76: 165–172. PMID: [17317131](#)
32. Dullemeijer C, Durga J, Brouwer IA, van de Rest O, Kok FJ, Brummer RJM, et al. n 3 fatty acid proportions in plasma and cognitive performance in older adults. *Amer J Clin Nutr*. 2007; 86: 1479–1485. PMID: [17991662](#)
33. Kalmijn S, van Boxtel MPJ, Ocke M, Verschuren WMM, Kromhout D, Launer LJ. Dietary intake of fatty acids and fish in relation to cognitive performance at middle age. *Neurology*. 2004; 62: 275–280. PMID: [14745067](#)
34. Kesse-Guyot E, Peneau S, Ferry M, Jeandel C, Hercberg S, Galan P, et al. Thirteen-year prospective study between fish consumption, long-chain n-3 fatty acids intakes and cognitive function. *J Nutr Health Aging*. 2011; 15: 115–120. PMID: [21365164](#)
35. Milte CM, Sinn N, Street SJ, Buckley JD, Coates AM, Howe PRC. Erythrocyte polyunsaturated fatty acid status, memory, cognition and mood in older adults with mild cognitive impairment and healthy controls. *Prostaglandins Leuko Essent Fatty Acids*. 2011; 84: 153–161. doi: [10.1016/j.plefa.2011.02.002](#) PMID: [21392955](#)
36. Muldoon MF, Ryan CM, Sheu L, Yao JK, Conklin SM, Manuck SB. Serum phospholipid docosahexaenoic acid is associated with cognitive functioning during middle adulthood. *J Nutr*. 2010; 140: 848–853. doi: [10.3945/jn.109.119578](#) PMID: [20181791](#)
37. Phillips MA, Childs CE, Calder PC, Rogers PJ. Lower omega-3 fatty acid intake and status are associated with poorer cognitive function in older age: A comparison of individuals with and without cognitive impairment and Alzheimer's disease. *Nutr Neurosci*. 2012; 15: 271–277.
38. Samieri C, Feart C, Proust-Lima C, Peuchant E, Dartigues JF, Amieva H, et al. Omega-3 fatty acids and cognitive decline: Modulation by ApoE(epsilon)4 allele and depression. *Neurobio Aging*. 2011; 32: e2313–2317.
39. Tan ZS, Harris WS, Beiser AS, Au R, Himali JJ, Debette S, et al. Red blood cell -3 fatty acid levels and markers of accelerated brain aging. *Neurology*. 2012; 78: 658–664. doi: [10.1212/WNL.0b013e318249f6a9](#) PMID: [22371413](#)
40. Titova OE, Sjogren P, Brooks SJ, Kullberg J, Ax E, Kilander L, et al. Dietary intake of eicosapentaenoic and docosahexaenoic acids is linked to gray matter volume and cognitive function in elderly. *Age*. 2013; 35: 1495–505. doi: [10.1007/s11357-012-9453-3](#) PMID: [22791395](#)
41. Whalley LJ, Fox HC, Wahle KW, Starr JM, Deary IJ. Cognitive aging, childhood intelligence, and the use of food supplements: possible involvement of n-3 fatty acids. *Amer J Clin Nutr*. 2004; 80: 1650–1657. PMID: [15585782](#)
42. Whalley LJ, Deary IJ, Starr JM, Wahle KW, Rance KA, Bourne V, et al. n-3 Fatty acid erythrocyte membrane content, APOE (epsilon)4, and cognitive variation: An observational follow-up study in late adulthood. *Amer J Clin Nutr*. 2008; 87: 449–454. PMID: [18258638](#)
43. Harada CN, Natelson Love MC, Triebel KL. Normal cognitive aging. *Clin Geriatr Med*. 2013; 29: 737–752. doi: [10.1016/j.cger.2013.07.002](#) PMID: [24094294](#)
44. Research!America, 2006. Available at: <http://www.researchamerica.org/publications/AmericaSpeaks/AmericaSpeaksV7.pdf>.
45. Jiao J, Li Q, Chu J, Zeng W, Yang M, Zhu S. Effect of n-3 PUFA supplementation on cognitive function throughout the life span from infancy to old age: a systematic review and meta-analysis of randomized controlled trials. *Am J Clin Nutr*. 2014; 100: 1422–1436. doi: [10.3945/ajcn.114.095315](#) PMID: [25411277](#)
46. Svennerholm L. Distribution and fatty acid composition of phosphoglycerides in normal human brain. *J Lipid Res*. 1968; 9:570–578. PMID: [4302302](#)
47. Carver JD, Benford V.J., Han B., Cantor A.B. The relationship between age and the fatty acid composition of cerebral cortex and erythrocytes in human subjects. *Brain Res Bull*. 2001; 56:79–85. PMID: [11704343](#)
48. Martinez M, Mougan I. Fatty acid composition of human brain phospholipids during normal development. *J Neurochem*. 1998; 71:2528–2533. PMID: [9832152](#)
49. Barcelo-Coblijn G, Hoggies E, Kitajka K, Puskas LG, Zvara A, Hackler L, Nyadas C, Penke Z, Farkas T. Modification by docosahexaenoic acid of age-induced alterations in gene expression and molecular composition of rat brain phospholipids. *Proc Natl Acad Sci USA*. 2003; 100:11321–6. PMID: [13679584](#)
50. Joffre C, Nadjar A, Lebbadi M, Calon F, Laye S. n-3 LCPUFA improves cognition: the young, the old and the sick. *Prost Leuko Essent Fatty Acid*. 2014; 91:1–20.

51. Diau G- Y, Hsieh AT, Sarkadi-Nagy EA, Wijendran V, Nathanielsz PW, Brenna JT. The influence of long chain polyunsaturate supplementation on docosahexaenoic acid and arachidonic acid in baboon neonate central nervous system. *BMC Med.* 2005; 3:11. PMID: [15975147](#)
52. Daiello LA, Gongvatana A, Dunsiger S, Cohen RA, Ott BR, for the Alzheimer's Disease Neuroimaging Initiative. Association of fish oil supplement use with preservation of brain volume and cognitive function. *Alzheimer's Dement.* 2014;
53. Braun SMG and Jessberger S. Adult neurogenesis: mechanisms and functional significance. *Develop.* 2014; 141:1983–1986.
54. Katakura M, Hashimoto M, Okui T, Shahdat HM, Matsuzaki K, Shido O. Omega-3 polyunsaturated fatty acids enhance neuronal differentiation in cultured rat neural stem cells. *Stem Cell Inter,* 2013;
55. Petursdottir AL, Farr SA, Morley JE, Banks WA, Skuladottir GV. Effect of dietary n-3 polyunsaturated fatty acids on brain lipid fatty acid composition, learning ability, and memory of senescence-accelerated mouse. *J Gerontol.* 2008; 63A:1153–1160.
56. Gamoh S, Hashimoto M, Hossain S, Masumura S. Chronic administration of docosahexaenoic acid improves the performance of radial arm maze task in aged rats. *Clin Exper Pharm Phys.* 2001; 28: 266–270.
57. Pan JP, Zhang HQ, Wang W, Guo YF, Xiao N, Cao XH, Liu LJ. Some subtypes of endocannabinoid/endovanilloid receptors mediate docosahexaenoic acid-induced enhanced spatial memory in rats. *Brain Res.* 2011; 1412:18–27. doi: [10.1016/j.brainres.2011.07.015](#) PMID: [21803345](#)
58. Stonehouse W. Does consumption of LC Omega-3 PUFA enhance cognitive performance in healthy school-aged children throughout adulthood? Evidence from clinical trials. *Nutr.* 2014; 6:2730–2758.
